# Supplementary material
Source: publisher figshare collection journal article supplement (https://sage.figshare.com/ndownloader/files/22125006)
Supplement: Supplementary file 1 [file 22125006]

## **SUPPLEMENTARY MATERIAL**

### ***Appendix S1 Nelson Hospital Questionnaire***

1. How bad is the pain in your thumb ***at rest when not using it?***

| None | minimal/occasional | mild | moderate | bad but bearable | severe | worst possible |
|------|--------------------|------|----------|------------------|--------|----------------|
| 12   | 10                 | 8    | 6        | 4                | 2      | 0              |

2. How bad is the pain in your thumb ***when you use it?***

| None | minimal/occasional | mild | moderate | bad but bearable | severe | worst possible |
|------|--------------------|------|----------|------------------|--------|----------------|
| 12   | 10                 | 8    | 6        | 4                | 2      | 0              |

3. Do you have weakness of the thumb?

| None | Mild (occasional) | Mild | Moderate | Severe |
|------|-------------------|------|----------|--------|
| 8    | 6                 | 4    | 2        | 0      |

4. Do you take tablets for the pain in your thumb?

| None | Occasionally | Regularly |
|------|--------------|-----------|
| 8    | 4            | 0         |

Please rate your ability to do the following tasks **using the affected hand**. Use the following scale:

|                                      |           |
|--------------------------------------|-----------|
| No problem                           | 10 points |
| Slight difficulty                    | 8 points  |
| Moderate difficulty                  | 6 points  |
| Very difficult                       | 4 points  |
| Impossible except with aid of gadget | 2 points  |
| Impossible                           | 0 points  |

5. Turning pages of a book ..... 6. Turning a key to lock a door .....

Score the last four tasks although they need **both hands**:

- |                          |                             |
|--------------------------|-----------------------------|
| 7. Opening a jar .....   | 8. Pulling up a zip .....   |
| 9. Getting dressed ..... | 10. Buttoning a shirt ..... |

## Appendix S2: Summary table of STRICTA criteria for acupuncture trial reporting

| Item | Feature                 | Description                                                                                                                                                                                                                                                                                                                                                                                                                                                                                                                                                                                                                                             | Reported on page |
|------|-------------------------|---------------------------------------------------------------------------------------------------------------------------------------------------------------------------------------------------------------------------------------------------------------------------------------------------------------------------------------------------------------------------------------------------------------------------------------------------------------------------------------------------------------------------------------------------------------------------------------------------------------------------------------------------------|------------------|
| 1    | Acupuncture rationale   | <p>Style: Manual</p> <p>Rationale: Western medical acupuncture based on local stimulus of the nervous system for pain relief (White 2009*)</p> <p>Literature sources for treatment plan: BMAS guide to acupuncture points and peer review. There are no published studies that report acupoints or treatment frequency or duration for this condition. Adequacy for chronic knee pain has been suggested as a minimum of 6 treatments, at least once a week (White 2008)</p>                                                                                                                                                                            | 3                |
| 2    | Needling details        | <p>Points used: see table 1 for acupoints protocol - a minimum four local points, from a choice of six for the initial session, and a choice of nine points for subsequent sessions.</p> <p>Number of needles: range (3-6), average initial session 4 acupoints, average 6<sup>th</sup> session 5 acupoints.</p> <p>Depth of insertion: &lt;1cm except 1<sup>st</sup> metacarpal base periosteal pecking and 1<sup>st</sup> dorsal interosseous muscle (LI4).</p> <p>Responses elicited: De Qi</p> <p>Needle stimulation: manual</p> <p>Needle retention time: ≥ 15 minutes</p> <p>Needle type: 0.3 x30mm gauge 8 Streitberger™ (asia-med, Germany)</p> | Table 1          |
| 3    | Treatment regime        | <p>Number of sessions: 6</p> <p>Frequency: twice weekly</p>                                                                                                                                                                                                                                                                                                                                                                                                                                                                                                                                                                                             | 5                |
| 4    | Co-interventions        | <p>None</p> <p>Setting: NHS secondary care, specialist hand clinic.</p>                                                                                                                                                                                                                                                                                                                                                                                                                                                                                                                                                                                 | 4                |
| 5    | Practitioner background | <p>Duration of training: BMAS (surgical registrars) and AACP (Physiotherapists) basic training courses.</p> <p>Length of clinical experience in acupuncture: 1-10 years</p> <p>Expertise in condition: specialists in Hand Surgery &amp; Hand Therapy.</p>                                                                                                                                                                                                                                                                                                                                                                                              | 5                |
| 6    | Control interventions   | <p>Intended effect: placebo (non-penetrating sham, participant blinded)</p> <p>Explanations given: The use of acupuncture as a treatment for pain, study purpose to assess if acupuncture would benefit those with basal thumb osteoarthritis, and the need to test the treatment by using true acupuncture or a treatment that looks like acupuncture.</p> <p>Details: Streitberger sham needle apparatus™ (asia-med, Germany)</p> <p>Sources justifying control: successful blinding has been achieved (McManus et al 2007), needling of non acupoints would be an invalid placebo as it</p>                                                          | 5                |

|                                                                                                                                                                                                                                        |  |                                                        |  |
|----------------------------------------------------------------------------------------------------------------------------------------------------------------------------------------------------------------------------------------|--|--------------------------------------------------------|--|
|                                                                                                                                                                                                                                        |  | would still stimulate the nervous system (White 2009). |  |
| <p>* White A. Western medical acupuncture: A definition. Acupuncture in Medicine. 2009, BMJ 27: 33-5.<br/> <a href="https://aim.bmj.com/content/acupmed/27/1/33.full.pdf">https://aim.bmj.com/content/acupmed/27/1/33.full.pdf</a></p> |  |                                                        |  |

## Part 1

Please put a mark next to each sensation on the table below to state whether or not you felt any specific *sensation*, and *how intense* that feeling was *or* whether you had *no feeling*.

|                | <i>None (0)</i> | <i>Slight (1)</i> | <i>Moderate (2)</i> | <i>Intense (3)</i> |
|----------------|-----------------|-------------------|---------------------|--------------------|
| Pricking       |                 |                   |                     |                    |
| Sharp          |                 |                   |                     |                    |
| Bruised        |                 |                   |                     |                    |
| Electric shock |                 |                   |                     |                    |
| Warm           |                 |                   |                     |                    |
| Spreading      |                 |                   |                     |                    |
| Dull Ache      |                 |                   |                     |                    |
| Heavy          |                 |                   |                     |                    |
| Numb           |                 |                   |                     |                    |
| Tingling       |                 |                   |                     |                    |
| Twinge         |                 |                   |                     |                    |
| Stinging       |                 |                   |                     |                    |
| Uncomfortable  |                 |                   |                     |                    |
| Fading         |                 |                   |                     |                    |
| Deep Ache      |                 |                   |                     |                    |
| Pressure       |                 |                   |                     |                    |
| Throbbing      |                 |                   |                     |                    |

Overall, did you think that *acupuncture* was painful? Please place a mark on the line below at the point which best describes how painful (or not) this was.

No Pain I \_\_\_\_\_ I Worst Pain Imaginable

**Parts 3 & 4 are additions for the purpose of this study and do not form part of the Southampton Needling Questionnaire; they were placed on study data collection forms after the questionnaire as shown. Their purpose was to ascertain the acceptability of acupuncture treatment and the effectiveness of blinding.**

**Part 3** (To be completed at the final treatment visit only)

Would you recommend acupuncture to other people with arthritis of the thumb? (Circle answer)

Yes No Don't know

**Part 4** (To be completed at final treatment visit only)

Do you think that you received true acupuncture treatment or the placebo 'sham needling'?

True acupuncture                  Sham needling                  Don't know



**Appendix S4: Flow diagram illustrating patient outcomes following expression of interest in study**

**(CONSORT 2010 Flow Diagram)**

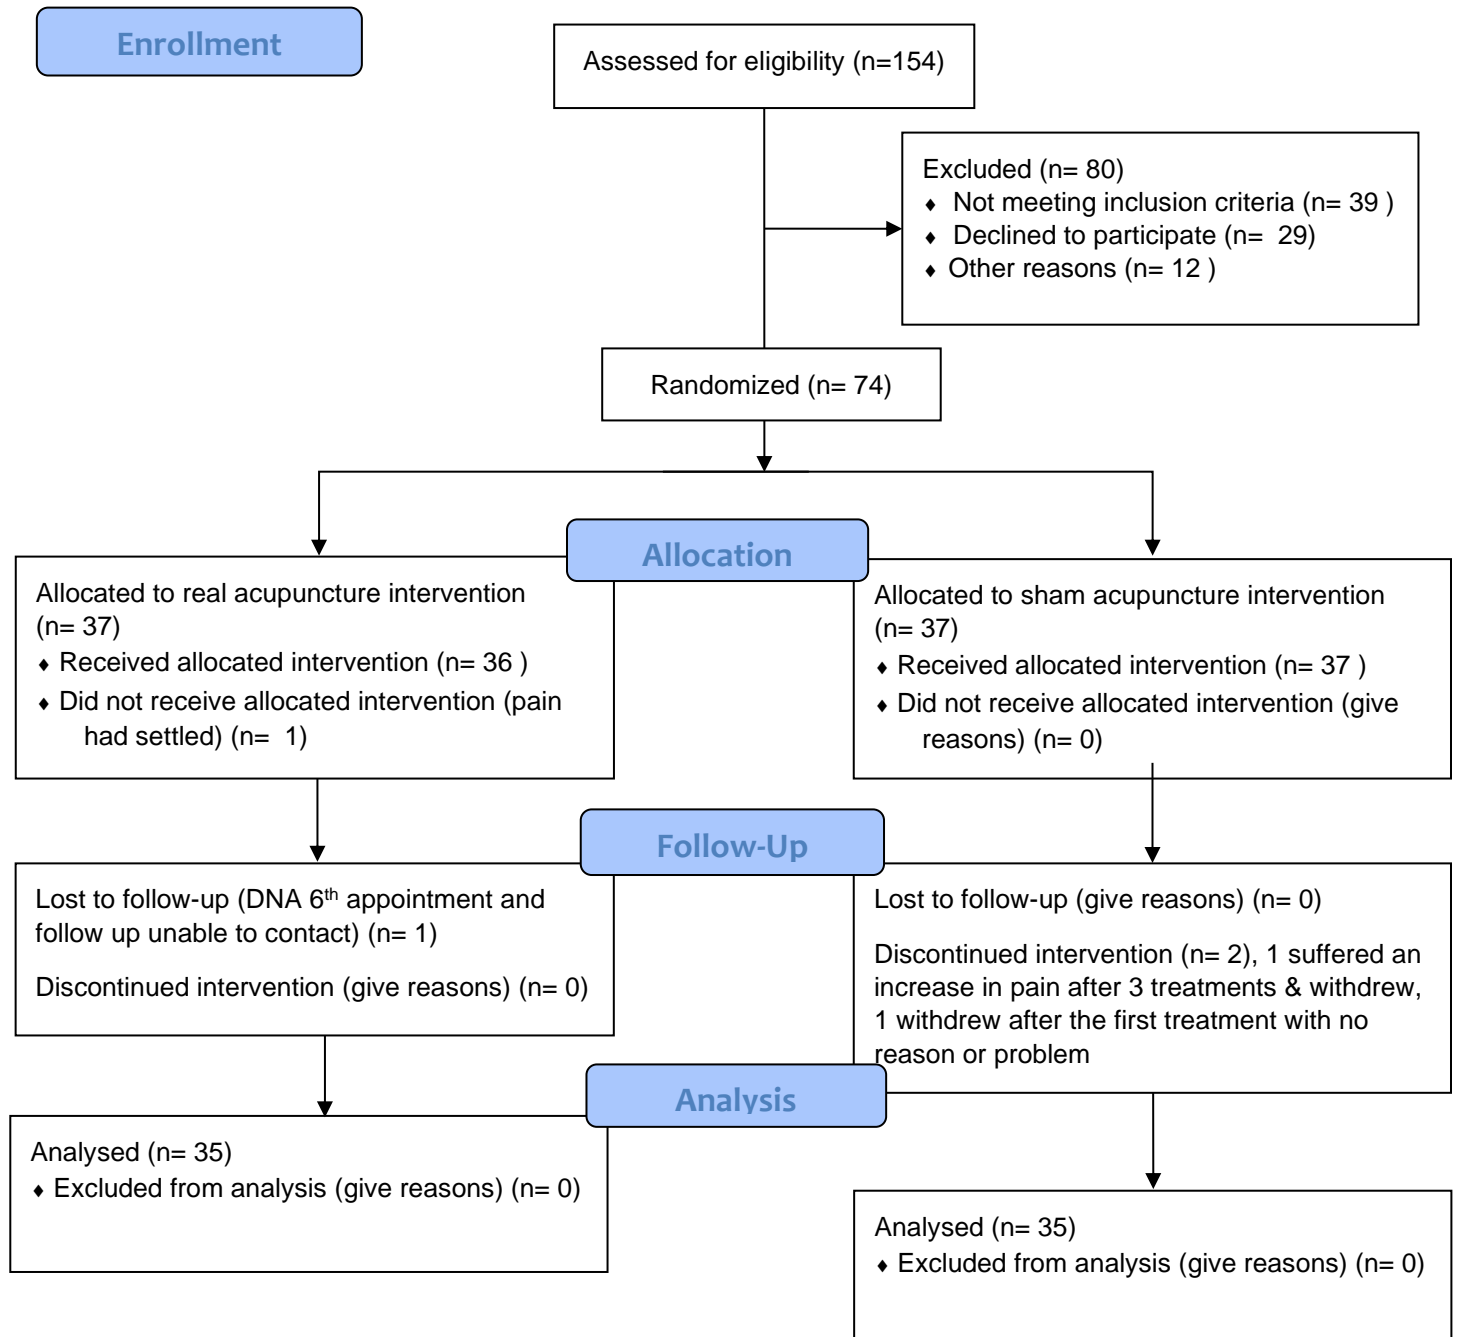

**Appendix S5: Baseline characteristics by treatment group**

(Values are number (%) unless otherwise stated)

| Variables                                 | Real acupuncture<br>(n=36) | Sham acupuncture<br>(n=37) |
|-------------------------------------------|----------------------------|----------------------------|
| <b>Demographic details:</b>               |                            |                            |
| Women                                     | 24 (66)                    | 27 (73)                    |
| Occupation group:                         |                            |                            |
| Working                                   | 14 (39)                    | 17 (46)                    |
| Retired                                   | 17 (47)                    | 18 (49)                    |
| Not known                                 | 5 (14)                     | 2 (5)                      |
|                                           |                            |                            |
| Affected side: Right                      | 19 (53)                    | 22 (59)                    |
| Dominant Hand: Right                      | 31(86)                     | 35 (95)                    |
|                                           |                            |                            |
| <b>Expectation of acupuncture effect:</b> |                            |                            |
| Positive                                  | 33 (91)                    | 34 (92)                    |
| Negative                                  | 1 (3)                      | 1 (3)                      |
| No expectations                           | 1 (3)                      | 0 (0)                      |
| Not known                                 | 1 (3)                      | 2 (5)                      |
|                                           |                            |                            |
| <b>Prior treatment:</b>                   |                            |                            |
| Paracetamol                               | 15 (42)                    | 13 (35)                    |
| NSAID                                     | 9 (25)                     | 9 (24)                     |
| Opiate                                    | 9 (25)                     | 7 (19)                     |
| Atypical analgesic                        | 1 (3)                      | 1 (3)                      |
| Previous splint                           | 17 (47)                    | 17 (46)                    |
| Previous exercise therapy                 | 12 (33)                    | 8 (22)                     |
|                                           |                            |                            |
| <b>Disease activity:</b>                  |                            |                            |
| Eaton Littler grading:                    |                            |                            |
| Stage 2                                   | 2 (5)                      | 4 (11)                     |
| Stage 3                                   | 15 (42)                    | 18 (49)                    |
| Stage 4                                   | 8 (22)                     | 9 (24)                     |
| Not done                                  | 11 (31)                    | 6 (16)                     |
| Mean (SD) duration of symptoms {months}   | 46.52 (59.56)              | 42.22 (63.12)              |
| Symptom stability:> 6 weeks               | 35 (97)                    | 35 (95)                    |

# Appendix S6: Outcomes of real and sham acupuncture additional measures

| Outcome                                                                                                                                                                                                                     | Groups | Baseline    | 1 week post<br>acupuncture | Within group difference from<br>baseline & level of<br>significance | Level of<br>significance for<br>the difference real<br>vs. sham |
|-----------------------------------------------------------------------------------------------------------------------------------------------------------------------------------------------------------------------------|--------|-------------|----------------------------|---------------------------------------------------------------------|-----------------------------------------------------------------|
| Grip strength<br>kg median<br>(IQR)                                                                                                                                                                                         | real   | 15 (9, 22)  | 17 (11, 24)                | 0.7 (-2, 5) p=0.1872                                                | p=0.3501                                                        |
|                                                                                                                                                                                                                             | sham   | 13(9, 22)   | 17 (9, 26)                 | 1.3 (-0.7, 4) <b>p</b> =0.0049                                      |                                                                 |
| ROM<br>Abduction ∞<br>Mean (SD)                                                                                                                                                                                             | real   | 45 (42, 47) | 46 (43, 49)                | 1 (-1.8, 3.5) p=0.5140                                              | p=0.5846                                                        |
|                                                                                                                                                                                                                             | sham   | 44 (41, 48) | 46 (44, 49)                | 2 (0, 4) p=0.0975                                                   |                                                                 |
| ROM<br>Extension ∞<br>Mean (SD)                                                                                                                                                                                             | real   | 44 (42, 47) | 44(42, 47)                 | 0 (-2, 2) p=1.0                                                     | p=0.2361                                                        |
|                                                                                                                                                                                                                             | sham   | 44 (41, 47) | 46 (42, 49)                | 2 (-0.5, 4.5) p=0.1153                                              |                                                                 |
| ∞ Abduction and extension by goniometry in degrees.                                                                                                                                                                         |        |             |                            |                                                                     |                                                                 |
| Data described by median and IQR if non-normal distribution (Wilcoxon signed rank and Mann Whitney tests used). Normally distributed data described by mean and 95% confidence interval (paired & two sample t-tests used). |        |             |                            |                                                                     |                                                                 |
